# Supplementary material for: Identification and Characterization of Foliar Fungi Associated with Beach Vitex (Vitex rotundifolia L.)
Source: MDPI journal article supplement (doi:10.3390/f14020220), 2023-01-24
Supplement: s1 [file s1]

**Supplementary Table S1.** Gene sequence information and GenBank accession numbers were used to construct phylogenetic trees in this study. Isolates from this study were bolded.

| Species                                | Host                             | Origin             | Isolate           | Accession numbers |                 |                 |
|----------------------------------------|----------------------------------|--------------------|-------------------|-------------------|-----------------|-----------------|
|                                        |                                  |                    |                   | ITS               | BT              | RPB2            |
| <b><i>Stagonosporopsis caricae</i></b> | <b><i>Vitex rotundifolia</i></b> | <b>South Korea</b> | <b>CMML 20-2</b>  | <b>MW149263</b>   | <b>MW149265</b> | <b>MW149264</b> |
| <i>S. caricae</i>                      | Brassica sp.                     | Indonesia          | CBS 282.76        | MH860977          | GU237682        | MT018022        |
| <i>S. caricae</i>                      | Zinnia elegans                   | Australia          | DAR 28714         | MK253236          | MK255067        | MK255066        |
| <i>S. chrysanthemi</i>                 | NA                               | Colombia           | CBS 124241        | MN973451          | MT005550        | MT018010        |
| <i>S. cucurbitacearum</i>              | Cucumis sp.                      | New Zealand        | CBS 133.96        | GU237780          | GU237686        | KT389676        |
| <i>S. loticola</i>                     | Lotus pedunculatus               | New Zealand        | CBS 562.81        | NR_163680         | GU237697        | KT389684        |
| <i>S. lupini</i>                       | Lupinus albus                    | UK                 | CBS 101494        | NR_160205         | GU237699        | KT389685        |
| <i>S. oculi-hominis</i>                | Man's corneal ulcer              | USA                | CBS 634.92        | MH862381          | GU237701        | KT389686        |
| <i>S. rudbeckiae</i>                   | Rudbeckia bicolor                | Netherlands        | CBS 109180        | GU237745          | GU237702        | MT018015        |
| <i>S. trachelii</i>                    | Campanula                        | Sweden             | CBS 384.68        | GU237856          | GU237679        | MT018016        |
| <i>S. valerianellae</i>                | Valerianella locusta             | Netherlands        | CBS 329.67        | NR_160109         | GU237706        | MT018034        |
| <i>Didymella macrostoma</i>            | Larix decidua                    | Germany            | CBS 482.95        | GU237869          | GU237626        | KT389609        |
| <i>S. astragali</i>                    | Astragalus sp.                   | Unknown            | CBS 178.25        | MH854839          | GU237677        | MT018030        |
|                                        |                                  |                    |                   | ITS               | OPA10-2         | endoPG          |
| <b><i>Alternaria alternata</i></b>     | <b><i>Vitex rotundifolia</i></b> | <b>South Korea</b> | <b>CMML 20-7</b>  | <b>OL307772</b>   | <b>OL687229</b> | <b>OL687233</b> |
| <b><i>A. alternata</i></b>             | <b><i>Vitex rotundifolia</i></b> | <b>South Korea</b> | <b>CMML 20-8</b>  | <b>OL307773</b>   | <b>OL687230</b> | <b>OL687234</b> |
| <b><i>A. alternata</i></b>             | <b><i>Vitex rotundifolia</i></b> | <b>South Korea</b> | <b>CMML 20-9</b>  | <b>OL307774</b>   | <b>OL687231</b> | <b>OL687235</b> |
| <b><i>A. alternata</i></b>             | <b><i>Vitex rotundifolia</i></b> | <b>South Korea</b> | <b>CMML 20-10</b> | <b>OL307775</b>   | <b>OL687232</b> | <b>OL687236</b> |
| <i>A. alternata</i>                    | Solanum                          | USA                | CBS 118814        | KP124357          | KP124669        | KP124059        |
| <i>A. alternata</i>                    | Arachis hypogaea                 | India              | CBS 916.96        | KF465761          | KP124632        | JQ811978        |
| <i>A. alternata</i>                    | Citrus reticulata                | USA                | CBS 102600        | KP124331          | KP124640        | KP124033        |
| <i>A. gaisen</i>                       | Pyrus pyrifolia                  | Japan              | CBS 632.93        | KC584197          | KP124742        | AY295033        |
| <i>A. gaisen</i>                       | Pyrus pyrifolia                  | Japan              | CBS 118488        | KP124427          | KP124743        | KP124132        |
| <i>A. arborescens</i>                  | Solanum                          | USA                | CBS 102605        | AF347033          | KP124712        | AY295028        |
| <i>A. longipes</i>                     | Nicotiana tabacum                | USA                | CBS 121332        | KP124443          | KP124746        | KP124149        |
| <i>A. gossypina</i>                    | Gossypium sp.                    | Zimbabwe           | CBS 104.32        | KP124430          | KP124760        | KP124135        |
| <i>A. iridialustralis</i>              | Iris sp.                         | Australia          | CBS 118486        | KP124435          | KP124751        | KP124140        |
| <i>A. eichhorniae</i>                  | Eichhomia crassipes              | India              | CBS 489.92        | KC146356          | KP124740        | KP124130        |
| <i>A. beta-kenyensis</i>               | Beta vulgaris var.               | Kenya              | CBS 118810        | KP124419          | KP124733        | KP124123        |
| <i>A. jacinthicola</i>                 | Eichhomia crassipes              | Mali               | CBS 133751        | KP124438          | KP124754        | KP124143        |
| <i>A. tomato</i>                       | Solanum                          | Unknown            | CBS 103.30        | KP124445          | KP124762        | KP124151        |
| <i>A. burnsii</i>                      | Cuminum                          | India              | CBS 107.38        | KP124420          | KP124734        | KP124124        |
|                                        |                                  |                    |                   | ITS               | CAL             | CHS-1           |
| <b><i>Colletotrichum aenigma</i></b>   | <b><i>Vitex rotundifolia</i></b> | <b>South korea</b> | <b>CMML 20-11</b> | <b>OL307776</b>   | <b>OL331023</b> | <b>OL687239</b> |
| <i>C. aenigma</i>                      | Persea americana                 | Israel             | ICMP 18608        | JX010244          | JX009683        | JX009774        |
| <i>C. aenigma</i>                      | Pyrus pyrifolia                  | Japan              | ICMP 18686        | JX010243          | JX009684        | JX009789        |
| <i>C. alienum</i>                      | Malus domestica                  | New zealand        | ICMP 12071        | JX010251          | JX009654        | JX009882        |
| <i>C. alienum</i>                      | Persea americana                 | Australia          | ICMP 18691        | JX010217          | JX009664        | JX009754        |
| <i>C. nupharicola</i>                  | Nymphaea odorata                 | USA                | ICMP 17940        | JX010188          | JX009662        | JX009836        |

| <i>C. nupharicola</i>         | Nuphar lutea subsp.              | USA                | ICMP 18187        | JX010187        | JX009663        | JX009835        |
|-------------------------------|----------------------------------|--------------------|-------------------|-----------------|-----------------|-----------------|
| <i>C. fructicola</i>          | Ficus edulis                     | Germany            | ICMP 17921        | JX010181        | JX009671        | JX009839        |
| <i>C. fructicola</i>          | Limonium sinuatum                | Israel             | ICMP 18613        | JX010167        | JX009675        | JX009772        |
| <i>C. musae</i>               | Musa sp.                         | USA                | ICMP 19119        | JX010146        | JX009742        | JX009896        |
| <i>C. queenslandicum</i>      | Carica papaya                    | Italy              | ICMP 1778         | JX010276        | JX009691        | JX009899        |
| <i>C. salsolae</i>            | Salsola tragus                   | Hungary            | ICMP 19051        | JX010242        | JX009696        | JX009863        |
| <i>C. tropicale</i>           | Theobroma cacao                  | Panama             | ICMP 18653        | JX010264        | JX009719        | JX009870        |
| <i>C. aeshynomenes</i>        | Aeshynomene                      | USA                | ICMP 17673        | JX010176        | JX009721        | JX009799        |
| <i>C. siamense</i>            | Coffea arabica                   | Thailand           | ICMP 18578        | JX010171        | FJ917505        | JX009865        |
| <i>C. asianum</i>             | Coffea arabica                   | Thailand           | ICMP 18580        | <b>FJ972612</b> | <b>FJ917506</b> | JX009867        |
| <i>C. gloeosporioides</i>     | Citrus limon                     | Italy              | ICMP 19121        | JX010148        | JX009745        | JX009903        |
|                               |                                  |                    |                   | ITS             | EF1 $\alpha$    | CAL             |
| <b><i>Fusarium humuli</i></b> | <b><i>Vitex rotundifolia</i></b> | <b>South Korea</b> | <b>CMML 20-12</b> | <b>OL307777</b> | <b>OL687237</b> | <b>OL331024</b> |
| <b><i>F. humuli</i></b>       | <b><i>Vitex rotundifolia</i></b> | <b>South Korea</b> | <b>CMML 20-13</b> | <b>OL307778</b> | <b>OL687238</b> | <b>OL331025</b> |
| <i>F. humuli</i>              | Musa paradisiaca                 | China              | LC7003            | MK280833        | MK289623        | MK289674        |
| <i>F. humuli</i>              | Ligustrum lucidum                | China              | CQ1027            | MK280843        | MK289567        | MK289709        |
| <i>F. humuli</i>              | Humulus scandens                 | China              | CQ1039            | MK280845        | MK289570        | MK289712        |
| <i>F. humuli</i>              | Musa nana                        | China              | LC12158           | MK280823        | MK289592        | MK289645        |
| <i>F. citri</i>               | Citrus reticulata                | China              | LC6896            | MK280803        | MK289617        | MK289668        |
| <i>F. luffae</i>              | Oryza sp.                        | China              | LC11638           | MK280836        | MK289581        | MK289657        |
| <i>F. sulawesiense</i>        | Musa sapientum                   | Congo              | NRRL 36548        | GQ505744        | GQ505655        | GQ505567        |
| <i>F. nanum</i>               | Musa nana                        | China              | LC12168           | MK280794        | MK289602        | MK289651        |
| <i>F. irregulare</i>          | Ganoderma sp.                    | Iran               | CBS 143595        | LT970814        | LT970778        | LT970731        |
| <i>F. guilinense</i>          | Musa nana                        | China              | LC12160           | MK280837        | MK289594        | MK289652        |
| <i>F. hainanense</i>          | Oryza sp.                        | China              | LC11638           | MK280836        | MK289581        | MK289657        |
| <i>F. concolor</i>            | Plant debris                     | South africa       | NRRL 13459        | GQ505763        | GQ505674        | GQ505585        |
